# Supplementary material for: High Contiguity de novo Genome Sequence Assembly of Trifoliate Yam (Dioscorea dumetorum) Using Long Read Sequencing
Source: MDPI journal article supplement (doi:10.3390/genes11030274), 2020-03-04
Supplement: s1 [file s1]

k-mer size = 19

proposed tetraploid

log kmers pairs

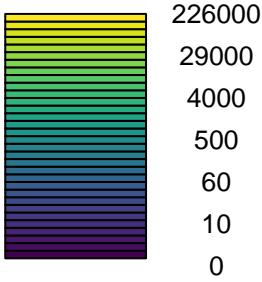

Total coverage of the kmer pair: A + B

2n  
3n  
4n  
5n  
6n  
7n  
8n

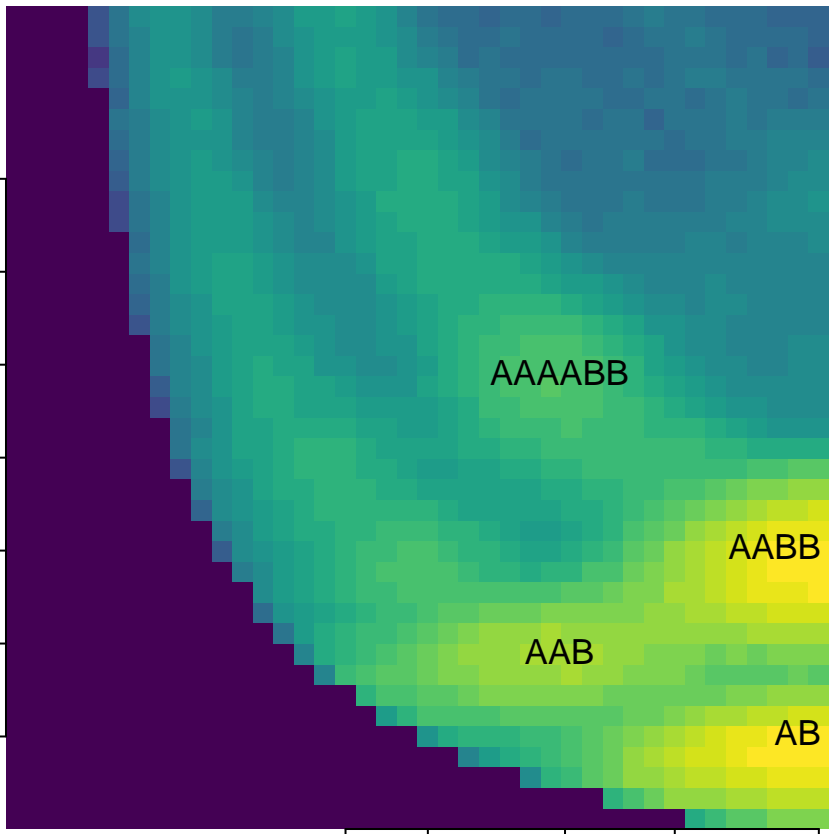

AAAABB

AABB

AAB

AB

|        |      |
|--------|------|
| AABB   | 0.45 |
| AB     | 0.38 |
| AAB    | 0.14 |
| AAAABB | 0.03 |

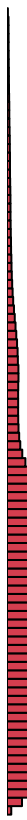

1n = 55

Normalized minor kmer coverage: B / (A + B)

k-mer size = 21

log kmers pairs

proposed diploid

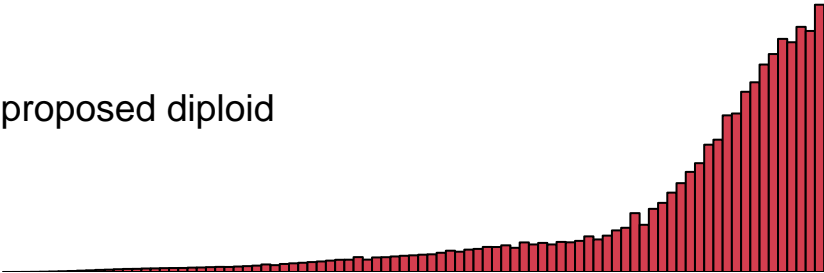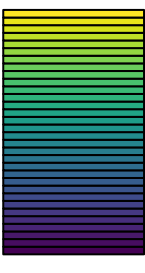

410000  
48000  
6000  
600  
70  
10  
0

Total coverage of the kmer pair: A + B

8n  
7n  
6n  
5n  
4n  
3n  
2n

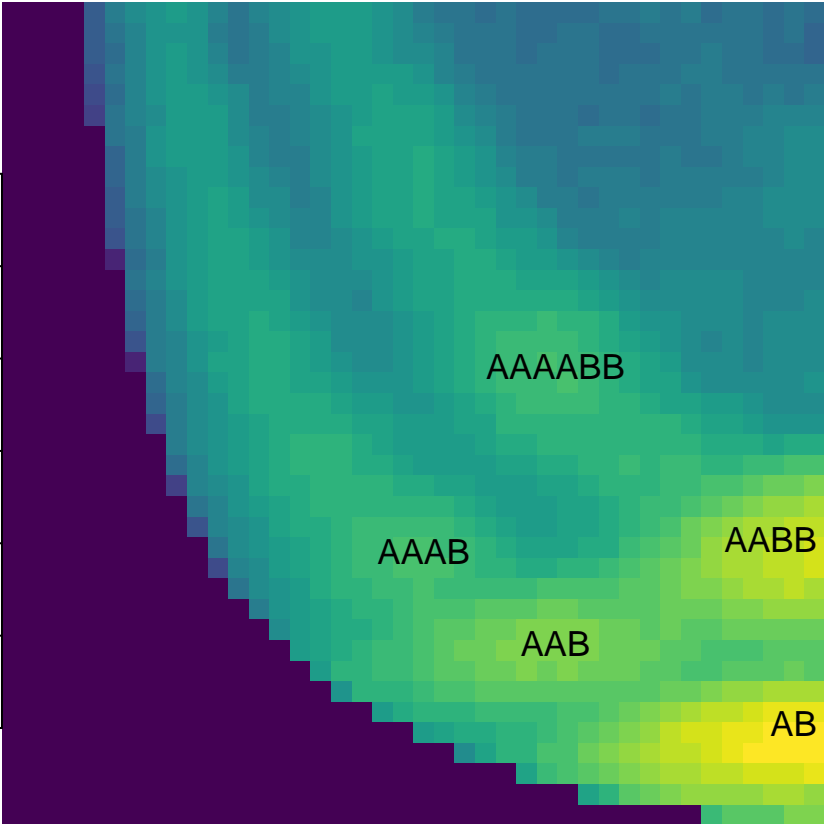

AB 0.6  
AABBB 0.24  
AAB 0.1  
AAAABB 0.03  
AAB 0.02

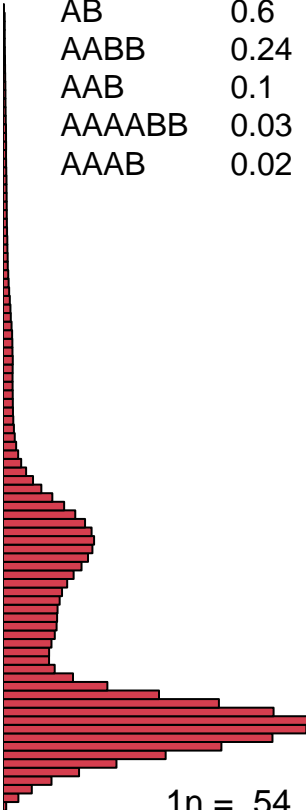

1n = 54

Normalized minor kmer coverage: B / (A + B)

1/5 1/4 1/3 2/5 1/2

k-mer size = 23

log kmers pairs

proposed diploid

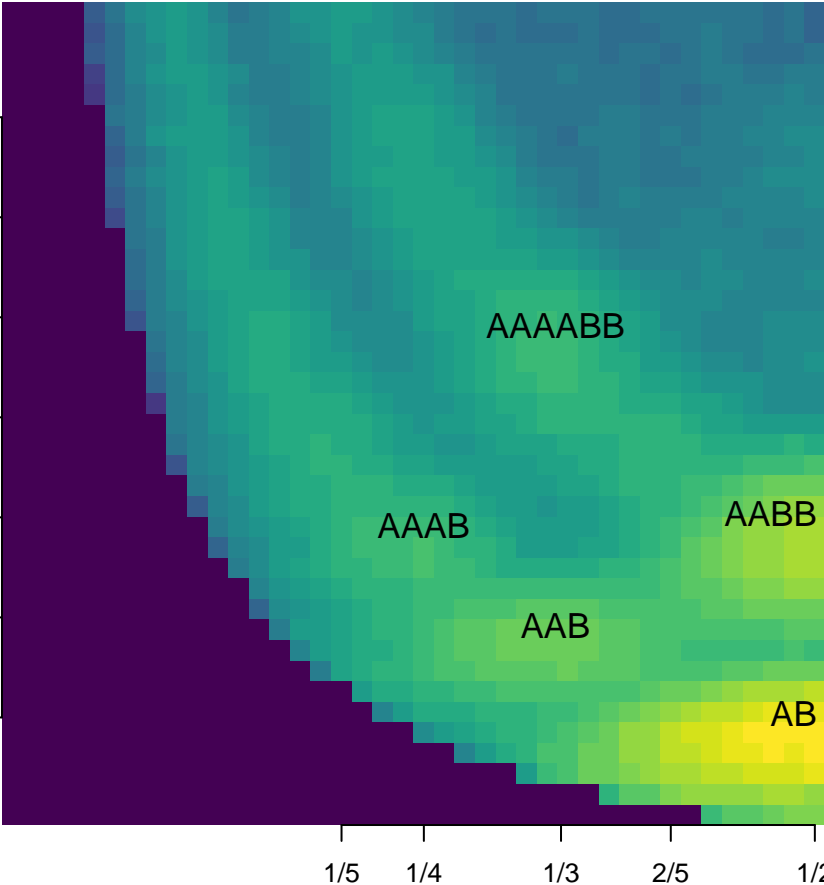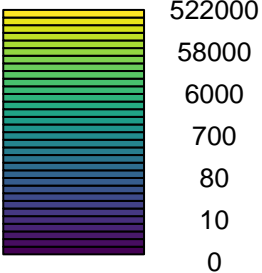

|        |      |
|--------|------|
| AB     | 0.71 |
| AABB   | 0.16 |
| AAB    | 0.08 |
| AAAB   | 0.03 |
| AAAABB | 0.03 |

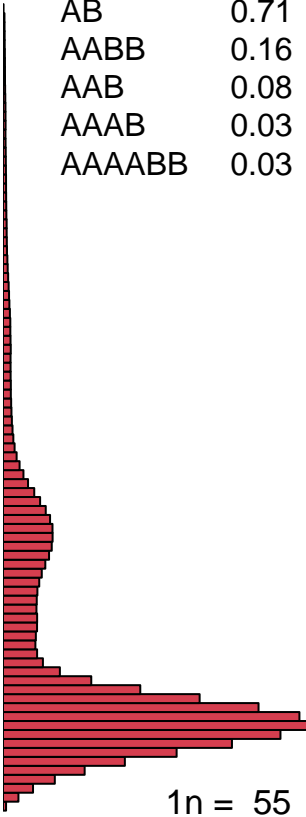

Normalized minor kmer coverage:  $B / (A + B)$

k-mer size = 25

log kmers pairs

proposed diploid

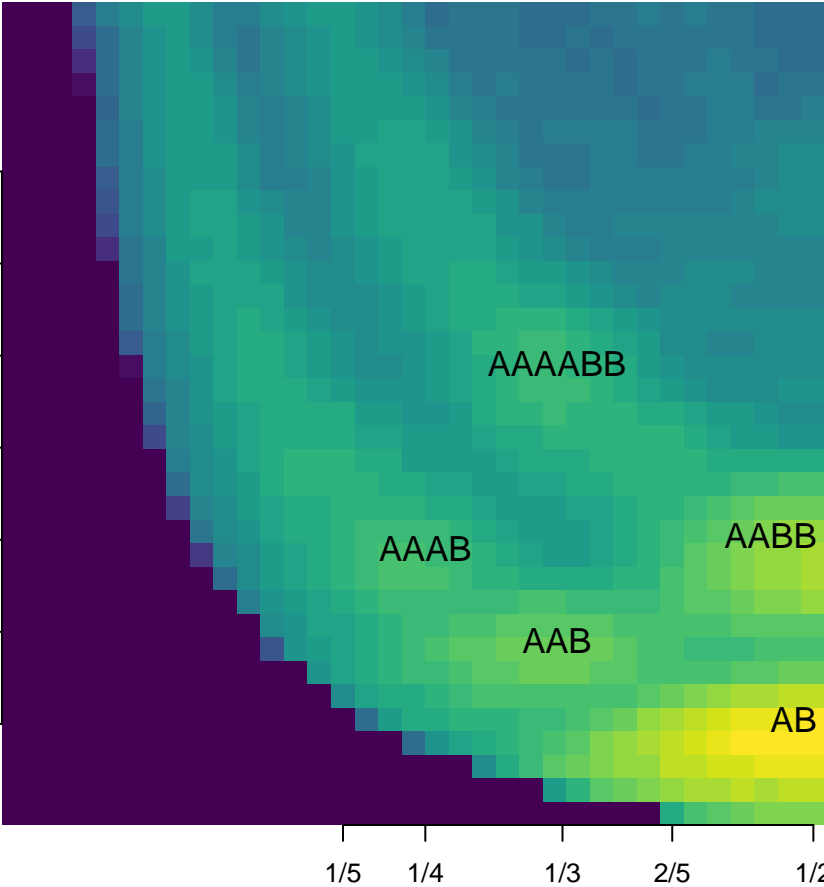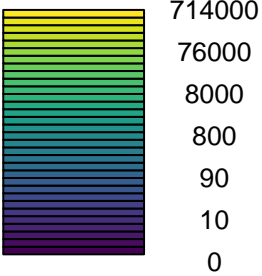

|        |      |
|--------|------|
| AB     | 0.76 |
| AABB   | 0.12 |
| AAB    | 0.07 |
| AAAB   | 0.02 |
| AAAABB | 0.02 |

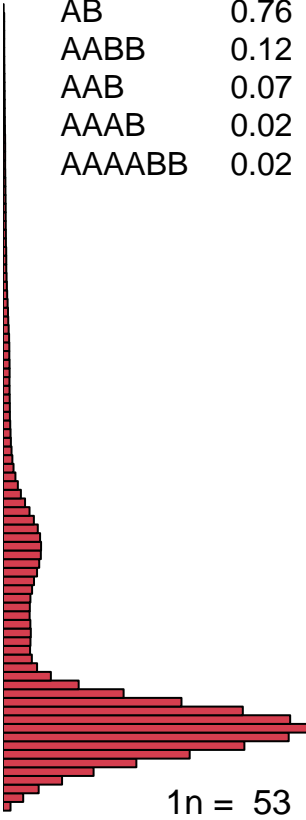

Normalized minor kmer coverage: B / (A + B)
