# Supplementary material for: High Contiguity de novo Genome Sequence Assembly of Trifoliate Yam (Dioscorea dumetorum) Using Long Read Sequencing
Source: MDPI journal article supplement (doi:10.3390/genes11030274), 2020-03-04

percentage of detected BUSCOs

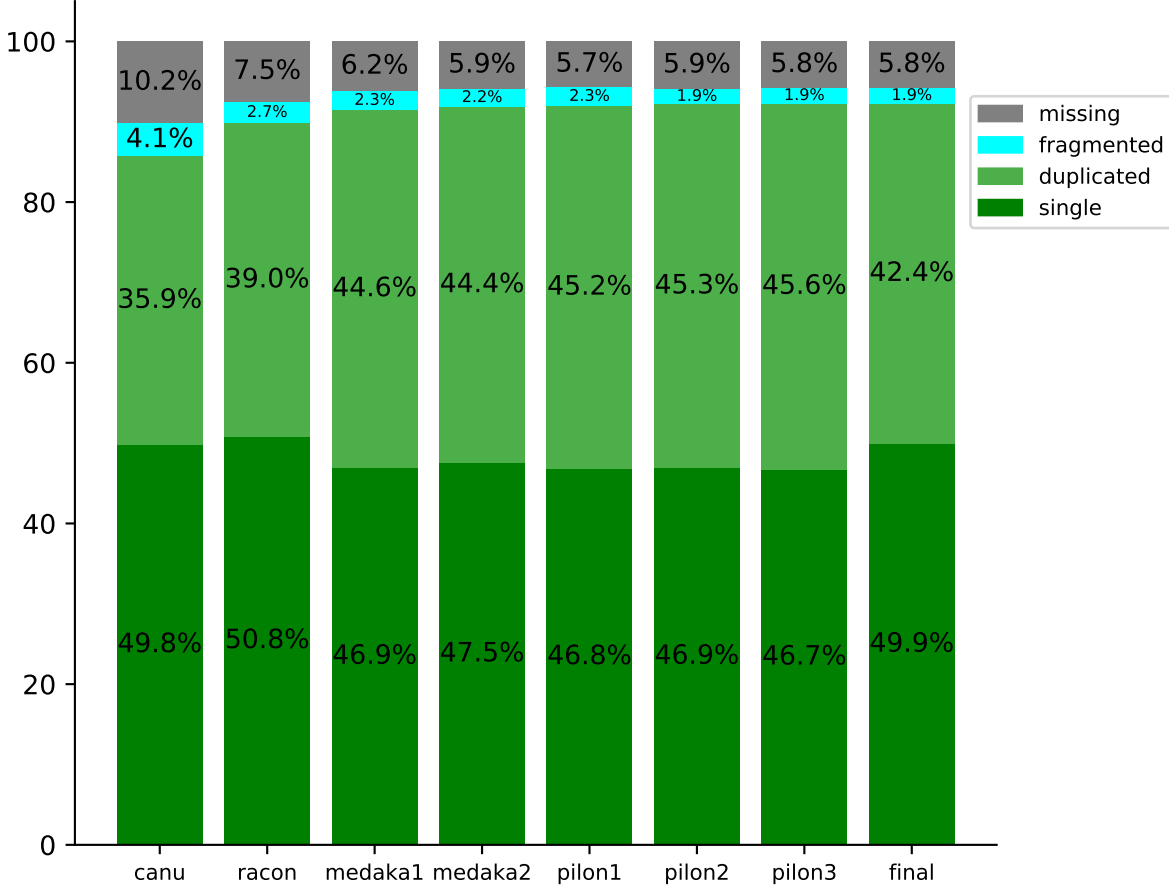

Supplement: s1 [file s1]
